# Supplementary material
Source: PubMed Central journal article supplement (PMC8844148)

## Online-Only Supplements

- A. Methods: Agreement on measures of guideline adherence
- B. eTable 1. Patient Characteristics with at least 1 Inadequate Weight Visit
- C. eTable 2. Patient Characteristics by Performance Group for Dietitian Assessments
- D. eFigure 1. Distribution of inadequate weight gain visits per infant  $\leq 24$  months old
- E. eFigure 2. Proportion of inadequate weight gain visits distributed across sites
- F. eFigure 3. Distribution of WHO Weight-For-Age Z Score at 24-27 months old across Centers

## E-Methods

### *Agreement on measures of guideline adherence*

Clinicians may disagree regarding practice definitions that measure adherence to a guideline. To address potential disagreement, we conducted a survey collected and managed using REDCap electronic data capture tools hosted at University of Washington<sup>1,2</sup> to obtain input on the appropriateness of a broad number of nutrition guideline measures with physicians and advanced practice providers. We surveyed 16 CF pediatric or joint pediatric and adult programs who participate in the CF Learning Network (CFLN) community. The CFLN is a collaborative group of CFF-accredited US Care Centers led jointly by clinicians and parent/patient partners and is structured to facilitate rapid quality improvement and learning<sup>3,4</sup>. The survey summarized measure statements for 25 nutrition management guidelines<sup>5,6</sup> and asked each respondent to rate level of agreement with the measure statement by a Likert scale. For example, to measure response by a dietitian assessment, we asked for agreement with the statement “if the patient has a visit with inadequate weight gain, we will measure if the patient has a dietitian assessment recorded at that visit or the subsequent visit.” We received responses from 15 physicians representing 12 programs. Twelve of 15 (80%) respondents were aware of the guideline definitions for expected average daily weight gain for infants. All measure statements had majority agreement from a range of 73% to 100%. Free text comments from respondents were also used to determine clarity of the measure statements. The study team used this input to refine the final practice definitions for the guidelines used in the analysis.

## References

1. Harris PA, Taylor R, Thielke R, Payne J, Gonzalez N, Conde JG. Research electronic data capture (REDCap)--a metadata-driven methodology and workflow process for providing translational research informatics support. *J Biomed Inform.* 2009;42(2):377-81.
2. Harris PA, Taylor R, Minor BL, Elliott V, Fernandez M, O'Neal L, et al. The REDCap consortium: Building an international community of software platform partners. *J Biomed Inform.* 2019;95:103208.
3. Martiniano SL, Daines CL, Dellon EP, Esther CR, Jr., Muhlebach MS, Ong T, et al. Highlights from the 2018 North American cystic fibrosis conference. *Pediatr Pulmonol.* 2019;54(7):941-8.
4. Britto MT, Fuller SC, Kaplan HC, Kotagal U, Lannon C, Margolis PA, et al. Using a network organisational architecture to support the development of Learning Healthcare Systems. *BMJ Qual Saf.* 2018;27(11):937-46.
5. Cystic Fibrosis F, Borowitz D, Robinson KA, Rosenfeld M, Davis SD, Sabadosa KA, et al. Cystic Fibrosis Foundation evidence-based guidelines for management of infants with cystic fibrosis. *J Pediatr.* 2009;155(6 Suppl):S73-93.
6. Lahiri T, Hempstead SE, Brady C, Cannon CL, Clark K, Condren ME, et al. Clinical Practice Guidelines From the Cystic Fibrosis Foundation for Preschoolers With Cystic Fibrosis. *Pediatrics.* 2016;137(4).

**eTable 1. Patients with at least 1 inadequate weight visit 0-24 months old**

| <b>Characteristic<sup>a</sup></b>                                        | <b>Total</b>  |
|--------------------------------------------------------------------------|---------------|
| Female                                                                   | 100 (46.3%)   |
| Race/Ethnicity                                                           |               |
| Black                                                                    | 12 (5.6%)     |
| Caucasian                                                                | 188 (87%)     |
| Hispanic                                                                 | 11 (5.1%)     |
| Other                                                                    | 5 (2.3%)      |
| Genotype (n=215)                                                         |               |
| Homozygous F508del                                                       | 123 (57.2%)   |
| Heterozygous F508del                                                     | 79 (36.7%)    |
| Other                                                                    | 13 (6.0%)     |
| Insurance status (n=214)                                                 |               |
| State or Federal Funded (e.g. Medicaid, Medicare, Indian Health Service) | 74 (34.6%)    |
| Private (e.g. commercial, HMO)                                           | 130 (60.7%)   |
| Military (e.g. Tricare)                                                  | 9 (4.2%)      |
| Other                                                                    | 1 (0.5%)      |
| Pancreatic insufficiency (n=211)                                         | 197 (93.4%)   |
| History of meconium ileus                                                | 26 (11.5%)    |
| Median age at diagnosis <sup>b</sup> , days (IQR)                        | 8 (2-18)      |
| Median birth weight, kg (IQR)                                            | 3.2 (2.9-3.5) |
| Ever Pseudomonas aeruginosa positive by 24 months old                    | 102 (47.2%)   |
| Median number of total visits per patient in 24 months (IQR)             | 13 (12-15)    |

<sup>a</sup>N=216 unless otherwise noted

<sup>b</sup>earliest date from sweat test or genetic testing date

**eTable 2. Patient Characteristics by Performance Group for Dietitian Assessments**

| Characteristic                                                           | Low RD sites  | High RD sites  | Mid RD sites (within limits) | p-value |
|--------------------------------------------------------------------------|---------------|----------------|------------------------------|---------|
| Number of infants                                                        | 34            | 39             | 153                          | 0.28    |
| Female                                                                   | 20 (58.8%)    | 16 (41.0%)     | 70 (48.8%)                   |         |
| Race/Ethnicity                                                           |               |                |                              | 0.41    |
| Black                                                                    | 4 (11.8%)     | 2 (5.1%)       | 6 (3.9%)                     |         |
| Caucasian                                                                | 28 (82.4%)    | 37 (94.9%)     | 132 (86.8%)                  |         |
| Hispanic                                                                 | 2 (5.9%)      | 0 (0.0%)       | 9 (5.9%)                     |         |
| Other                                                                    | 0 (0.0%)      | 0 (0.0%)       | 5 (2.6%)                     |         |
| Genotype                                                                 |               |                |                              | 0.22    |
| Homozygous F508del                                                       | 19 (55.9%)    | 23 (59.0%)     | 83 (54.6%)                   |         |
| Heterozygous F508del                                                     | 10 (29.4%)    | 14 (35.9%)     | 62 (40.8%)                   |         |
| Other                                                                    | 5 (14.7%)     | 2 (5.1%)       | 7 (4.6%)                     |         |
| Insurance status                                                         |               |                |                              | 0.75    |
| State or Federal Funded (e.g. Medicaid, Medicare, Indian Health Service) | 12 (36.4%)    | 17 (43.6%)     | 49 (32.0%)                   |         |
| Private (e.g. commercial, HMO)                                           | 21 (63.6%)    | 20 (51.3%)     | 94 (61.8%)                   |         |
| Military (e.g. Tricare)                                                  | 0 (0.0%)      | 2 (5.1%)       | 7 (4.6%)                     |         |
| Other                                                                    | 0 (0.0%)      | 0 (0.0%)       | 2 (1.3%)                     |         |
| Pancreatic insufficiency <sup>a</sup>                                    | 33 (97.1%)    | 34 (89.5%)     | 137 (92.6%)                  | 0.46    |
| History of meconium ileus                                                | 7 (20.6%)     | 8 (20.5%)      | 11 (7.2%)                    | 0.013   |
| Median age at diagnosis <sup>b</sup> , days (IQR)                        | 16.4 (0-29.2) | 18.3 (11-25.6) | 11.0 (3.7-20.1)              | 0.020   |
| Mean birth weight, kg (SD)                                               | 3.2 (0.4)     | 3.3 (0.5)      | 3.2 (0.4)                    | 0.57    |
| Ever Pseudomonas aeruginosa positive by 24 months old                    | 1 (2.9%)      | 1 (2.6%)       | 7 (4.6%)                     | 0.75    |
| Median number of clinic visits in 24 months (IQR)                        | 11 (10-12)    | 13 (11-14)     | 11 (10-13)                   | 0.006   |

<sup>a</sup>Fecal elastase <=200 ug/g or 2 PI-causing CFTR mutations

<sup>b</sup>earliest of sweat test or genetic testing date

**eFigure 1. Distribution of inadequate weight gain visits per infant  $\leq 24$  months old**

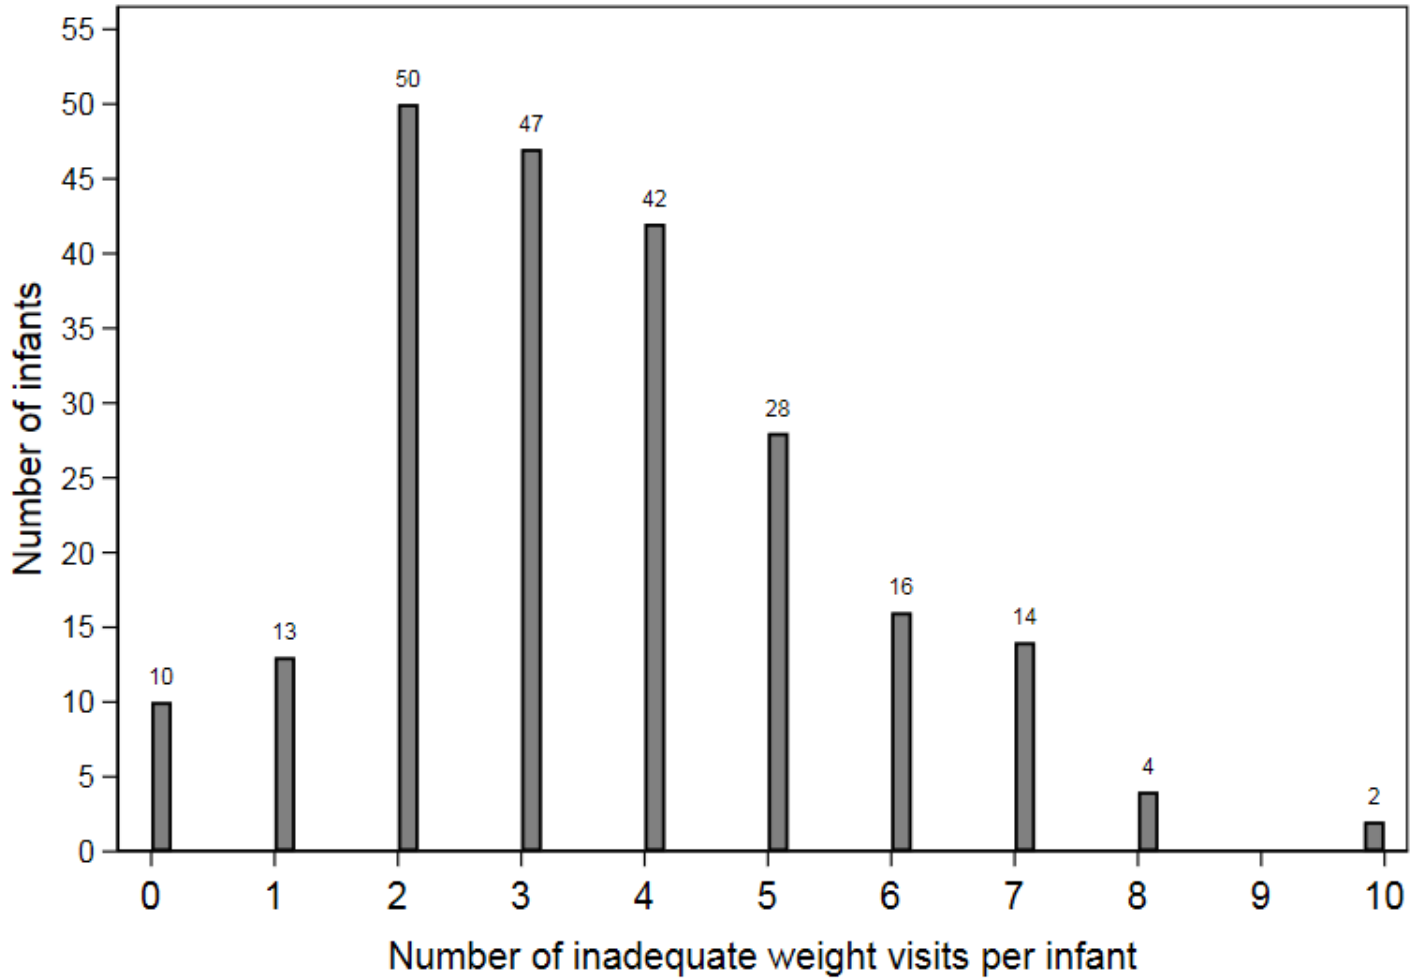

eFigure 2. Proportion of inadequate weight gain visits distributed across sites

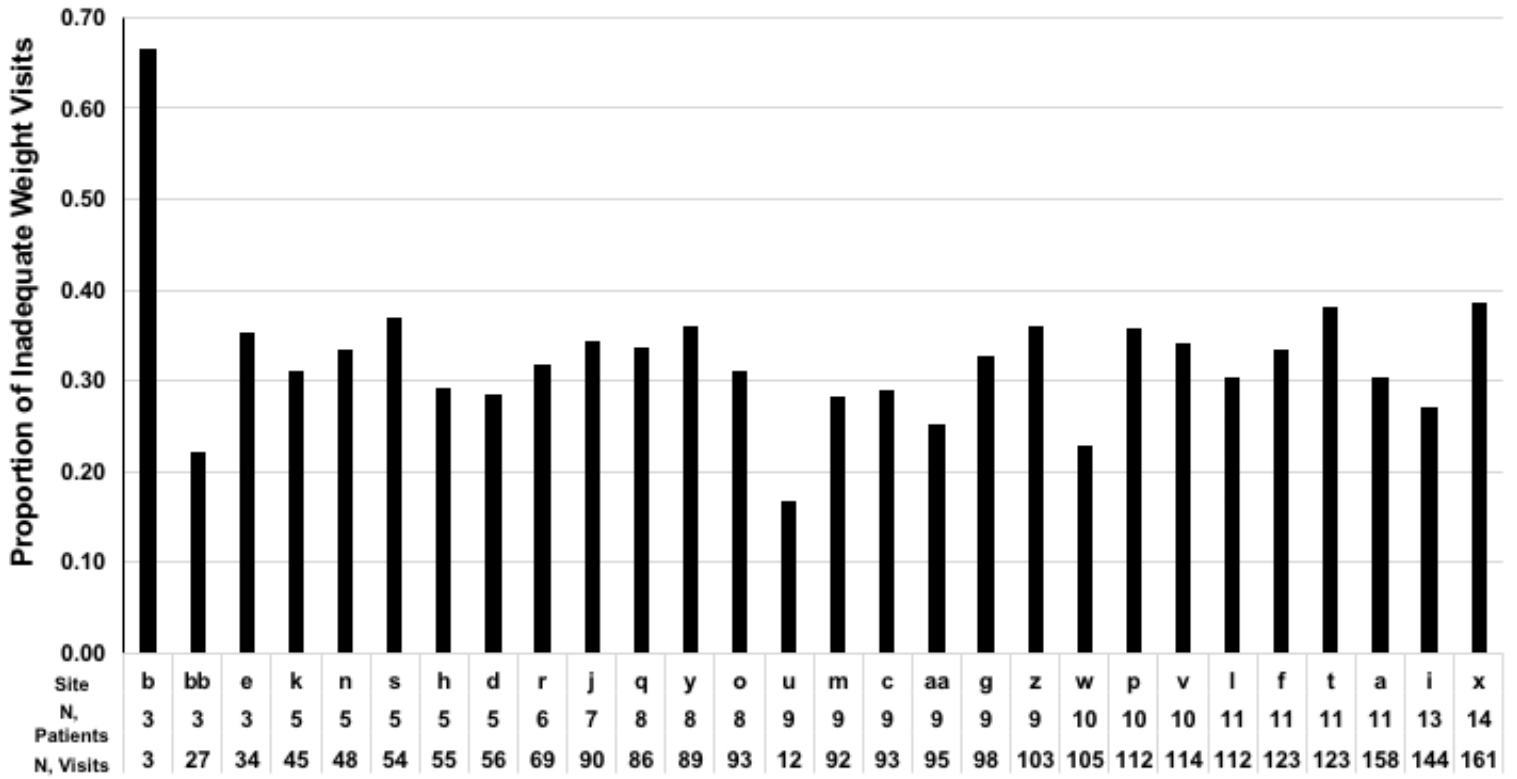

**eFigure 3. Distribution of WHO Weight-For-Age Z Score at 24-27 months old across Centers**

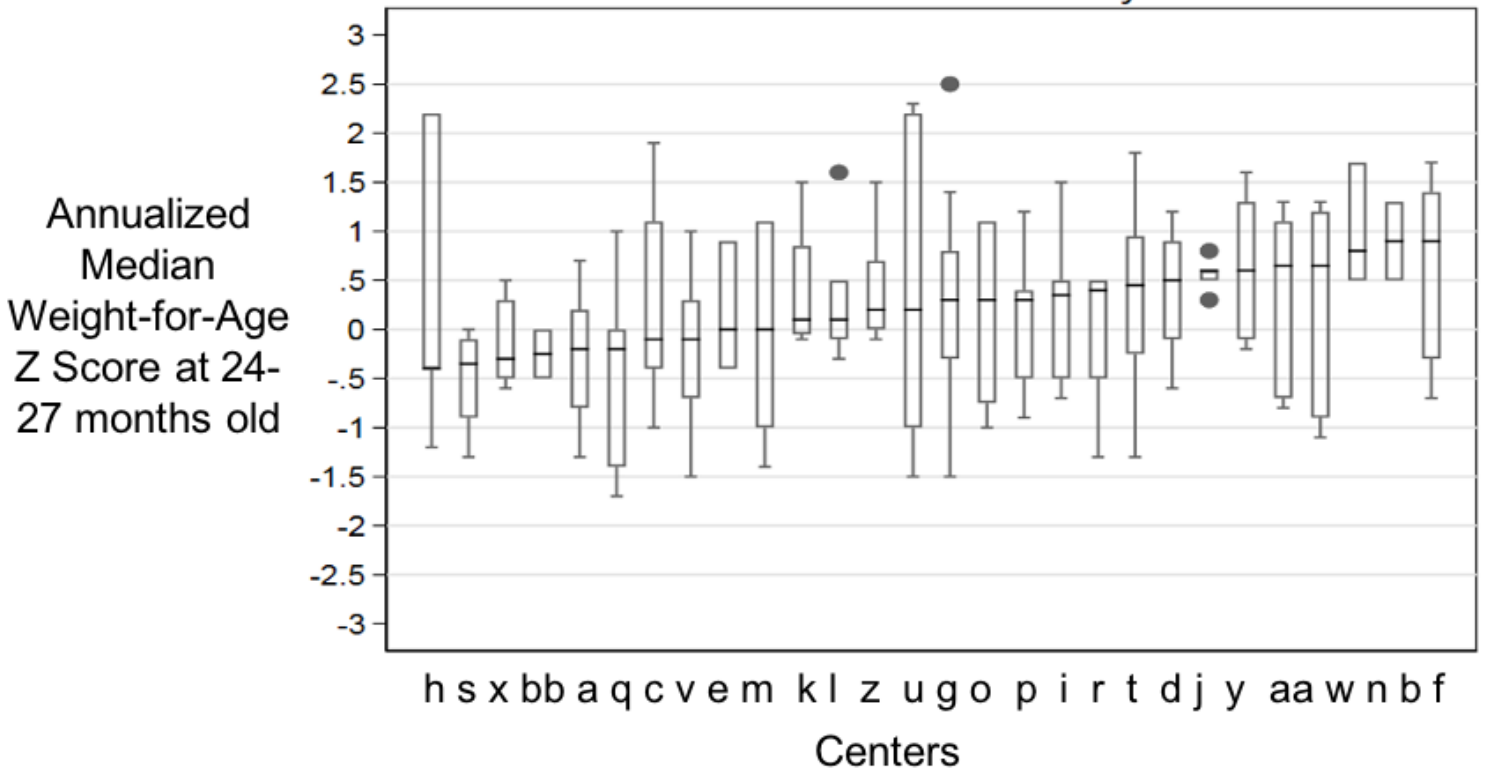

Supplement: NIHMS1756923-supplement-1.pdf [file NIHMS1756923-supplement-1.pdf]
